# Supplementary material for: BMPER is a marker of adipose progenitors and adipocytes and a positive modulator of adipogenesis
Source: PubMed Central journal article supplement (PMC10264349; doi:10.1038/s42003-023-05011-w), 2023-06-13
Supplement: 42003_2023_5011_MOESM1_ESM.pdf [file 42003_2023_5011_MOESM1_ESM.pdf]

**BMPER is a marker of adipose progenitors and adipocytes and a positive  
modulator of adipogenesis**

Jacob D. Garritson, Jiabi Zhang, Alan Achenbach, Maroua Ferhat, Emile Eich, Chris J.

Stubben, Paige L. Martinez, Anna R. Ibele, Keren Hilgendorf and Sihem Boudina

**Supplemental Material**

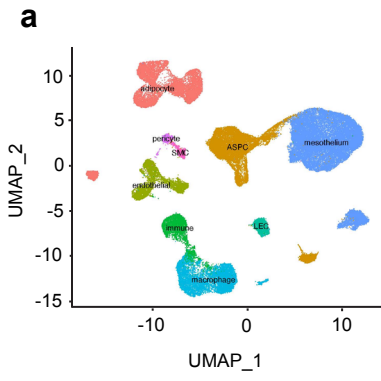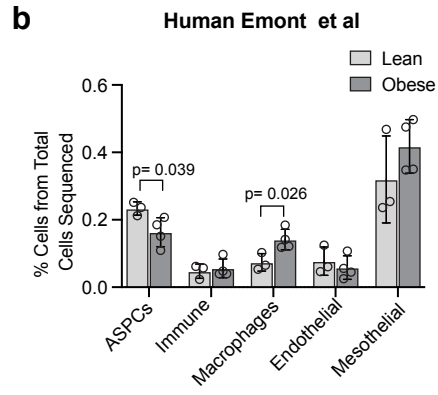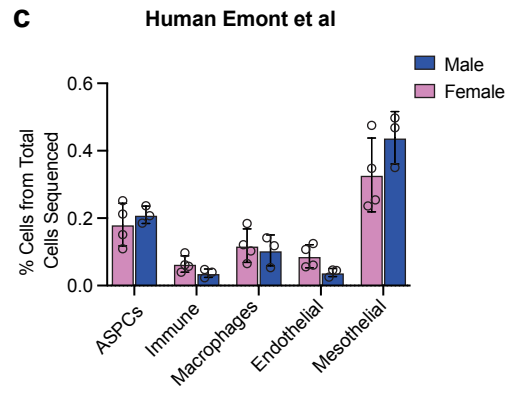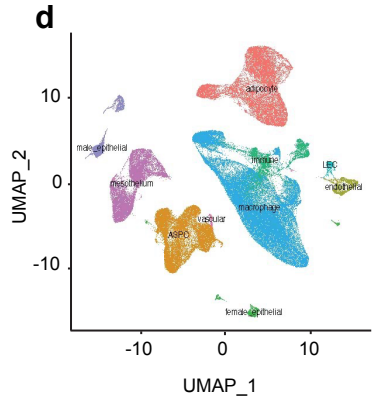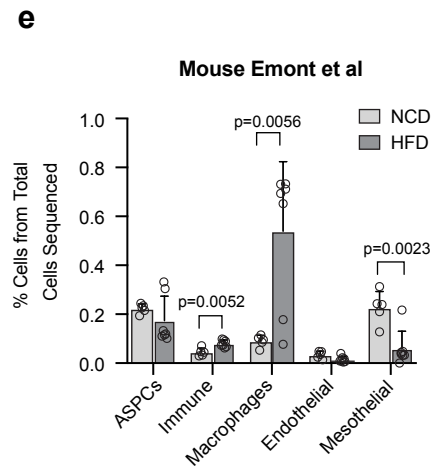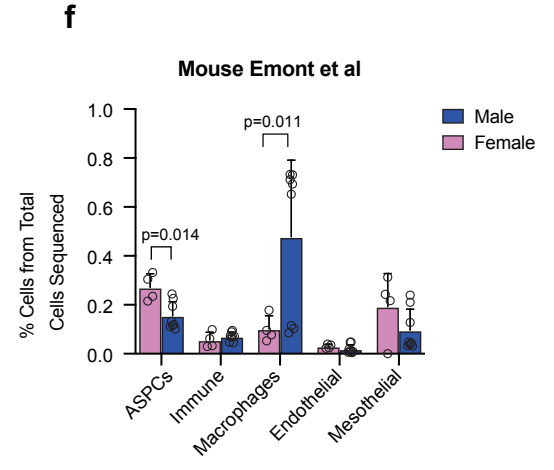

**Supplementary Figure 1: Re-analysis of single nuclei RNA sequencing (snRNA-seq) data published by Emont MP et al., Nature 2022 (GSE176171).** **A.** Aggregate UMAP of major cell types in the stromal vascular fraction (SVF) of human omental fat from 7 patients (1 lean male, 2 obese males, 2 lean females and 2 obese females). **B.** Aggregate UMAP of major cell types in the stromal vascular fraction (SVF) of mouse from epididymal fat samples from 5 normal chow diet (NCD) and 5 high fat diet (HFD) fed male mice and periovarian fat samples from 2 NCD and 2 HFD female mice respectively. **C.** Proportion of each cell type in lean or obese male and female subjects. **D.** Proportion of each cell type in male or female lean and obese subjects. **E.** Proportion of each cell type in male or female NCD and HFD mice. **F.** Proportion of each cell type male or female mice fed NCD and HFD. Values are mean  $\pm$  SD. \* $p < 0.05$ ; \*\* $p < 0.005$  versus lean or versus male assessed by a *t* Test in each cell cluster.

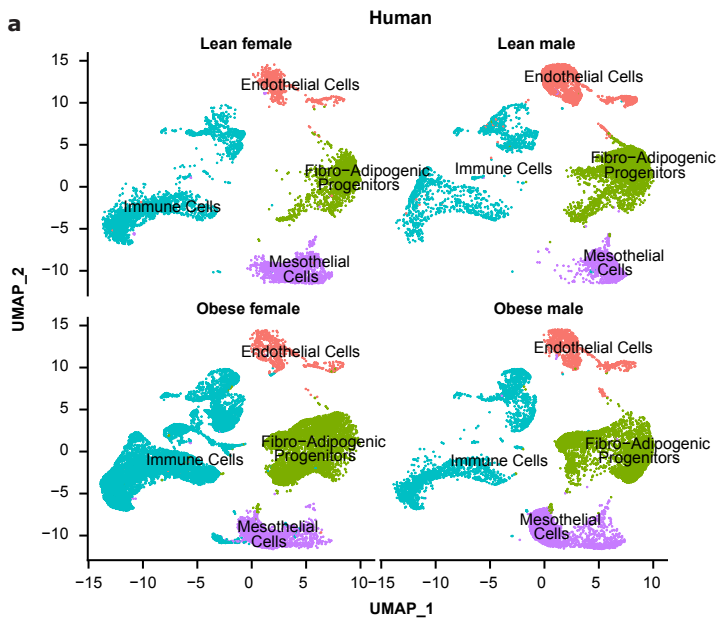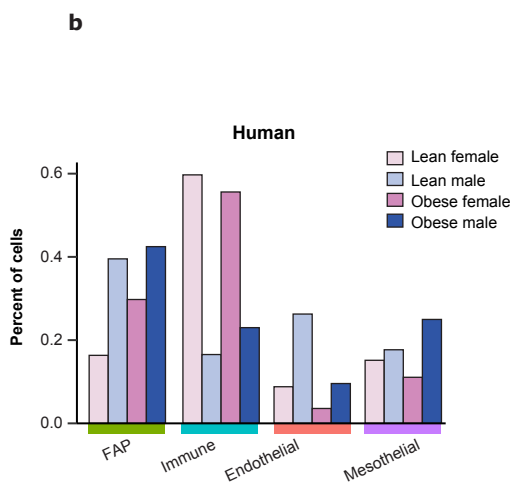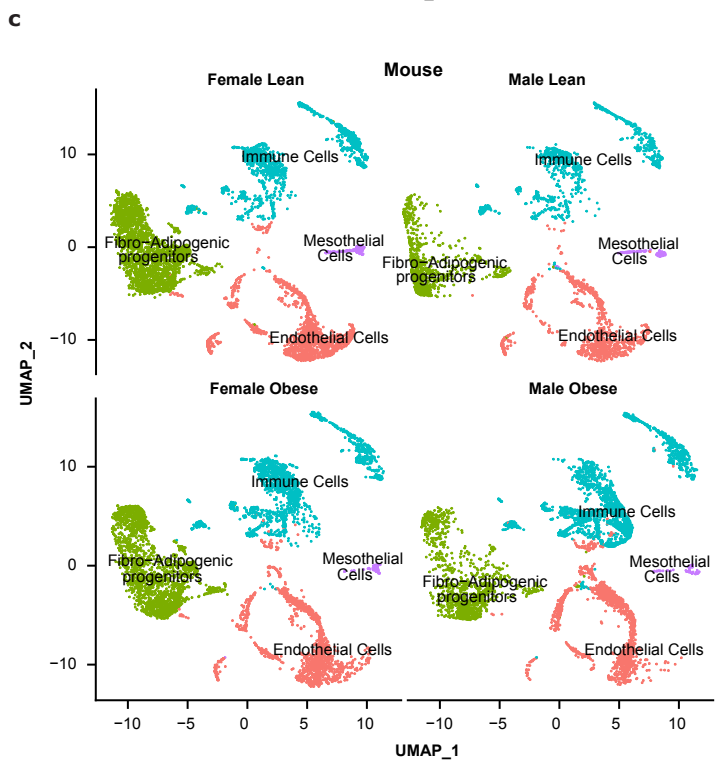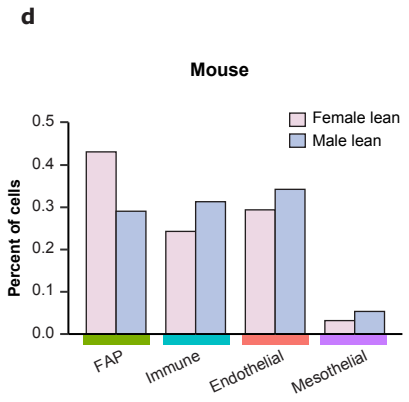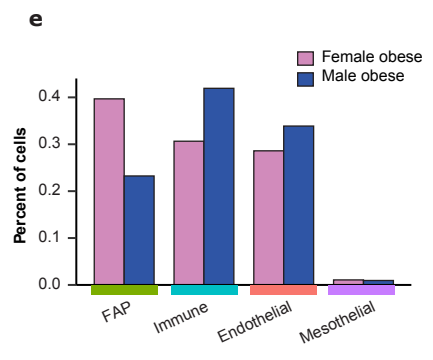



**Supplementary Figure 2: Clustering of male and female visceral SVF cell clusters separated by obesity status.**

**A.** UMAP of major cell types in the SVF of human omental fat samples from male and female patients separated by obesity status. **B.** Proportion of each cell type in female or male lean or obese human samples. **C.** UMAP of major cell types in the SVF of male and female mouse perigonadal fat samples separated by diet. **D** and **E.** Proportion of each cell type in female or male mouse samples separated by diet.

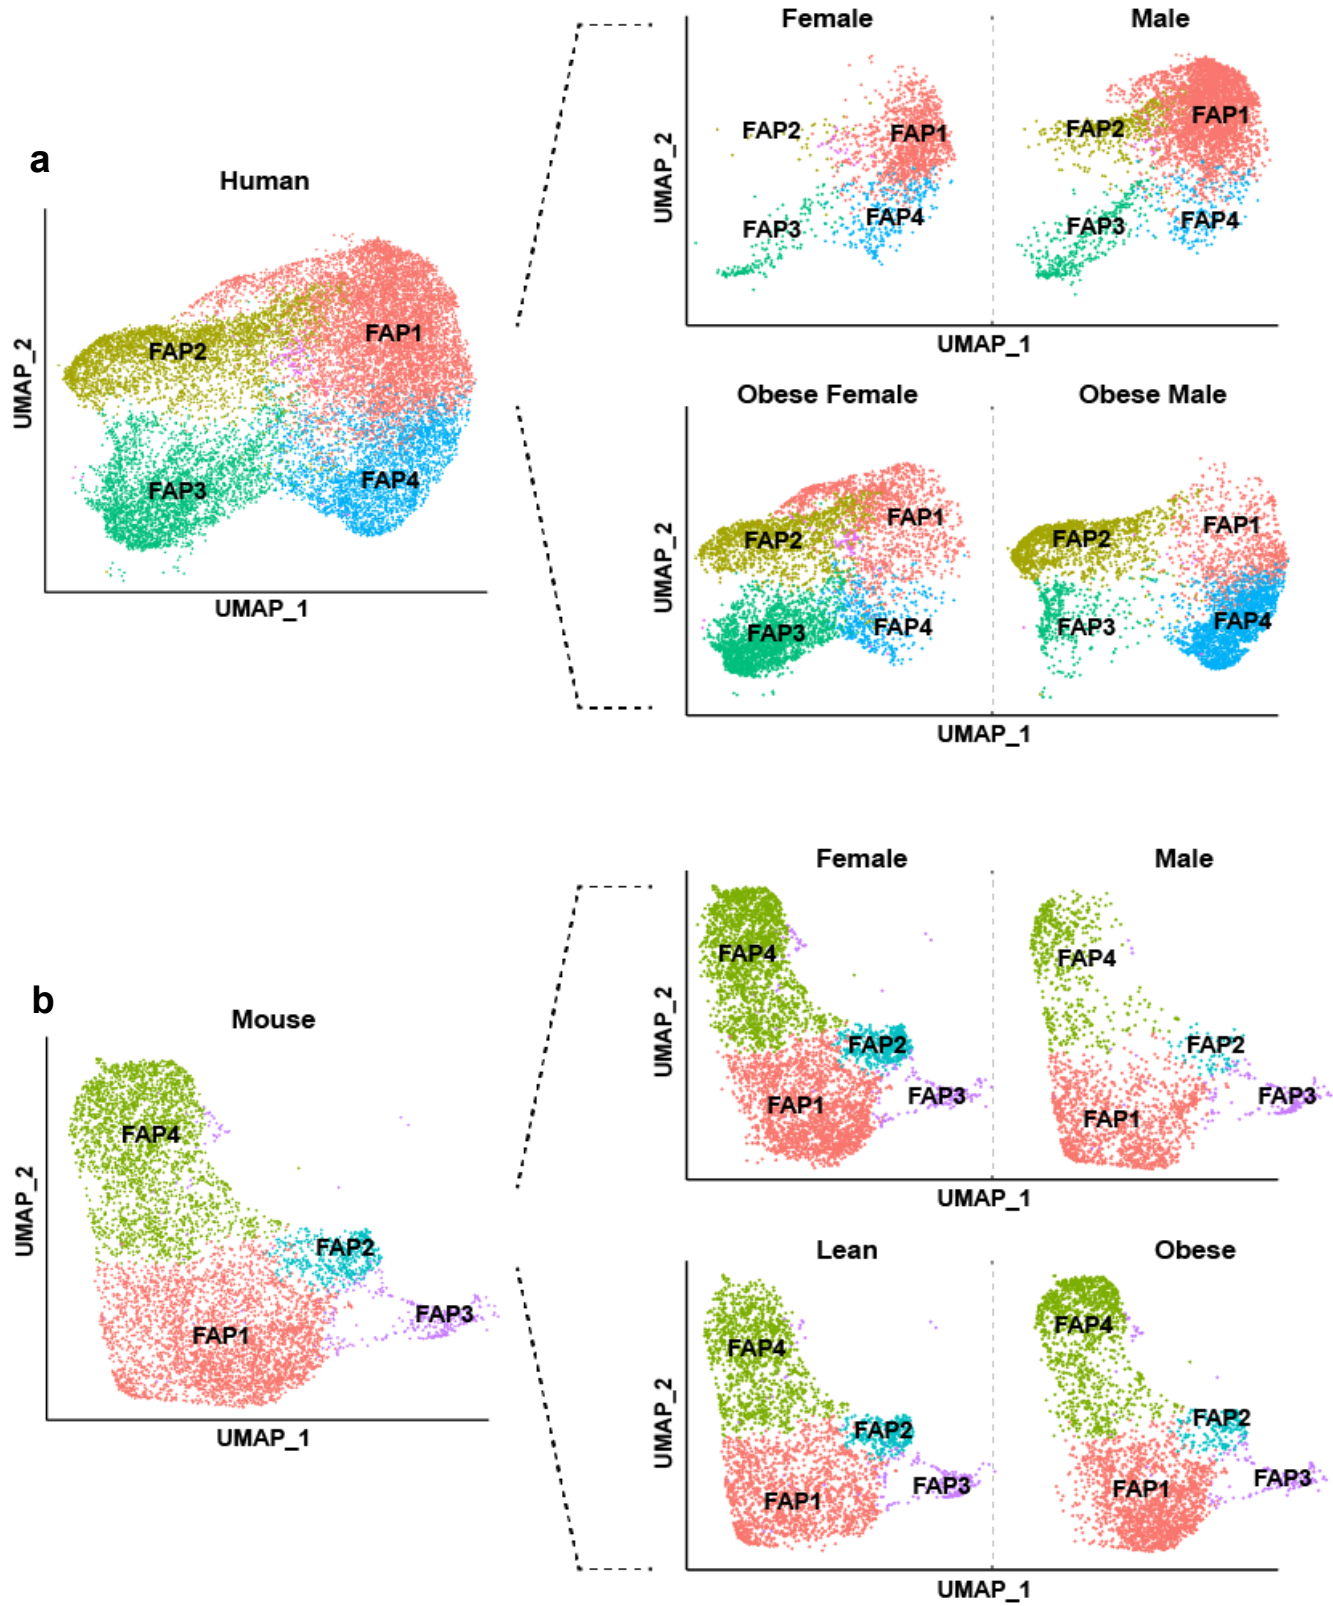

**Supplementary Figure 3: Heterogeneity of fibro-adipogenic progenitors (FAPs) in VAT of humans and mice.**

**A.** UMAP of sub-clustering of aggregate male and female FAPs in humans; split by sex and obesity status. **B.** UMAP of sub-clustering of aggregate male and female FAPs in mice; split by sex and obesity status.

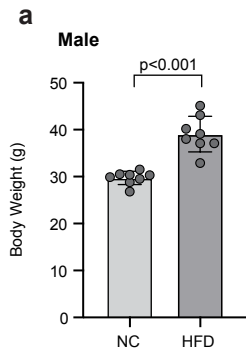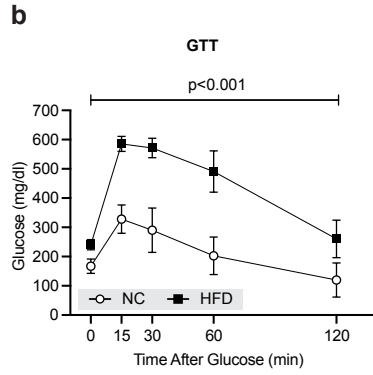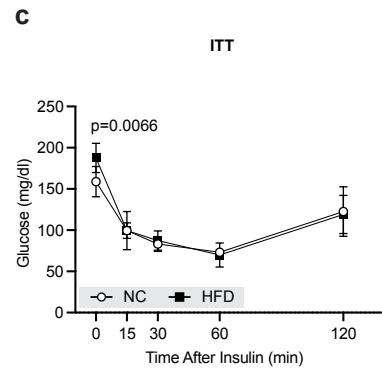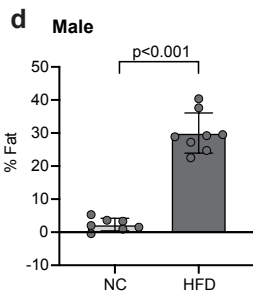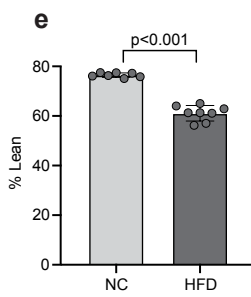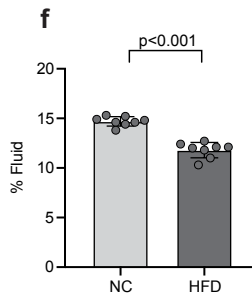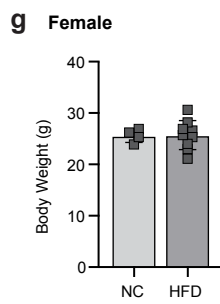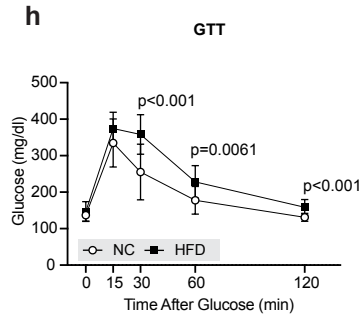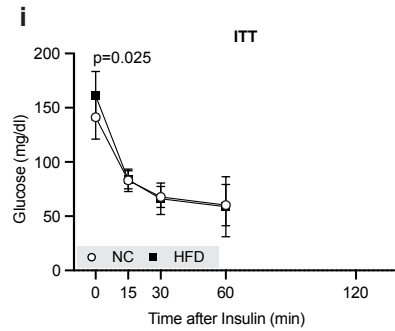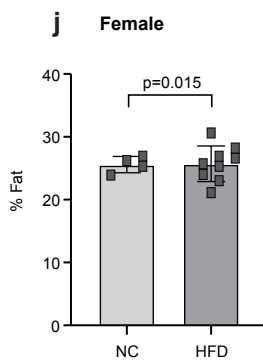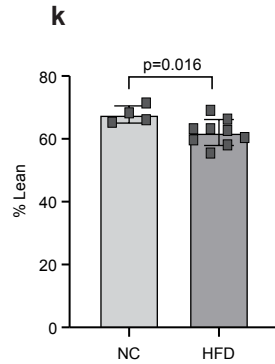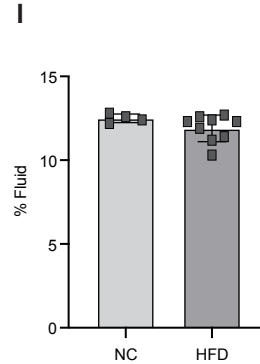

**Supplementary Figure 4: Metabolic phenotyping of male and female mice.**

**A** and **G**. Body weight gain in male and female C57BL6/J mice after 8 weeks of normal chow (NC) or high fat diet (HFD) feeding. **B** and **H**. Glucose tolerance tests in male and female mice fed NC or HFD. **C** and **I**. Insulin tolerance tests in male and female mice fed NC or HFD. **D** and **J**. Percent (%) fat mass in male and female mice fed NC or HFD. **E** and **K**. Percent (%) lean mass in male and female mice fed NC or HFD. **F** and **L**. Percent (%) fluid in male and female mice fed NC or HFD. Values are mean  $\pm$  SD.

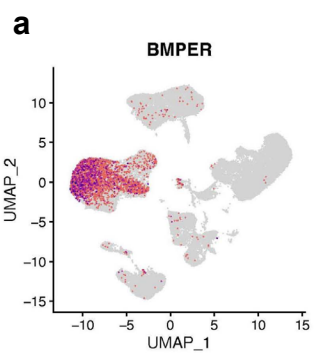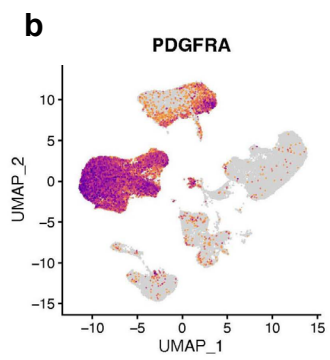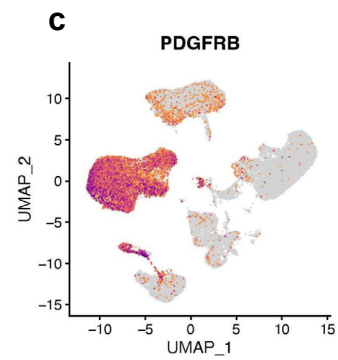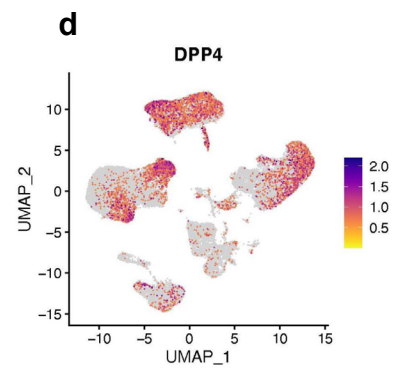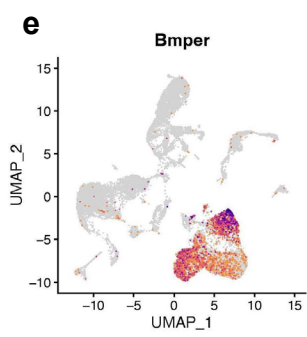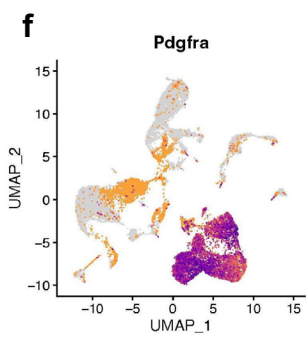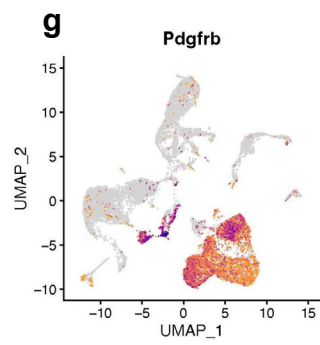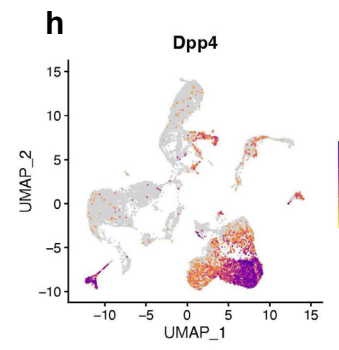

**Supplementary Figure 5:** UMAPs of aggregated human (**A-D**) and aggregated mouse (**E-H**) omental and perigonadal fat showing BMPER, PDGFRA, PDGFRB and DPP4 positive cells in our scRNA-seq data set. N=9 patients (2 lean male, 2 obese male, 2 lean female and 3 obese female subjects. N=4 mouse samples (1 NCD male, 1 HFD male, 1 HFD male and 1 HFD female samples with each sample including 10 mice total).

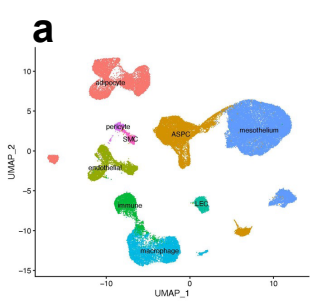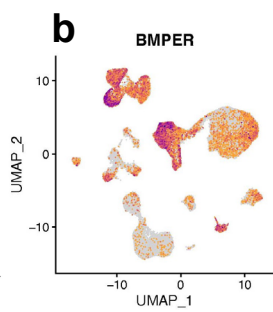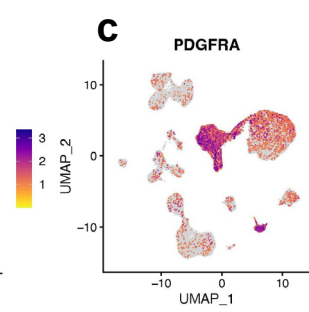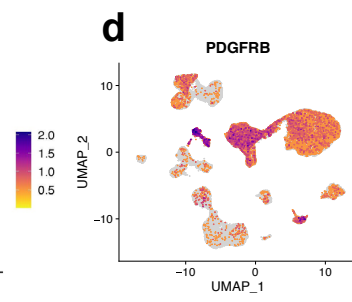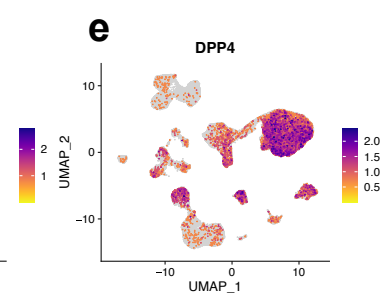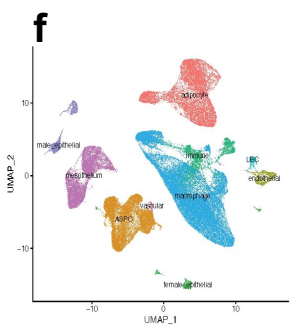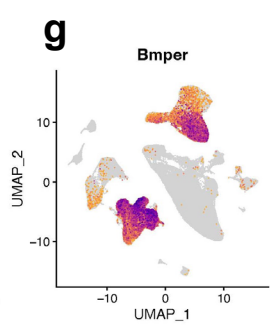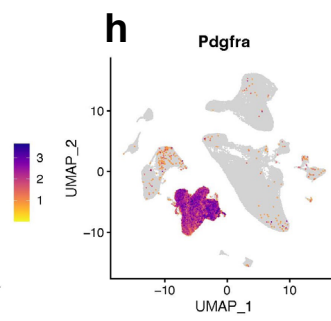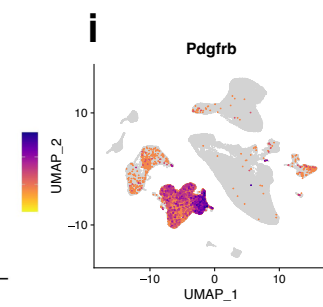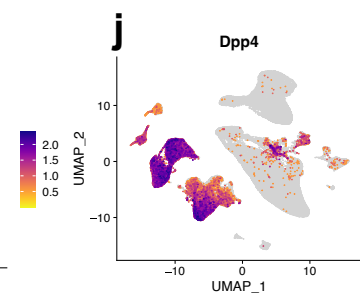



**Supplementary Figure 6:** UMAPs of aggregated human (**A-E**) and aggregated mouse (**F-J**) omental and perigonadal fat showing BMPER, PDGFRA, PDGFRB and DPP4 positive cells in publicly available (GSE176171) single nuclei RNA sequencing (snRNA-seq). N=7 patients (1 lean male, 2 obese male, 2 lean female and 2 obese female subjects). N=14 mice (5 NCD male, 5 HFD male, 2 NCD female and 2 HFD female mice).

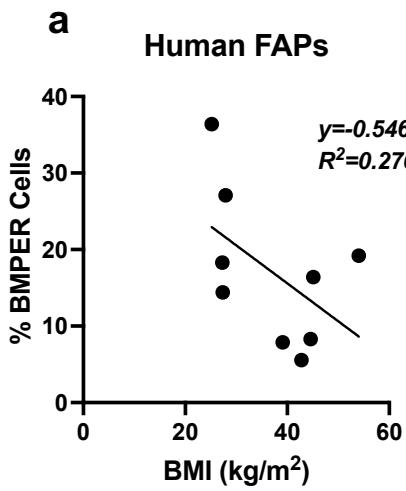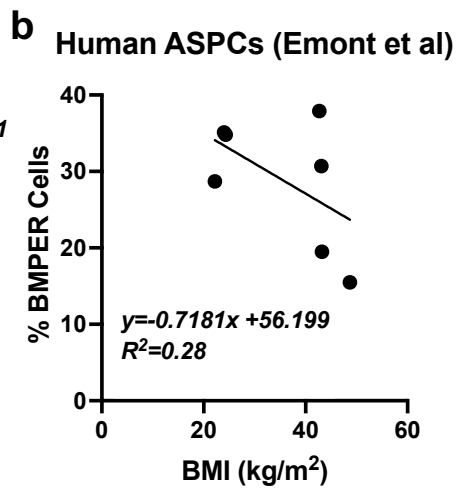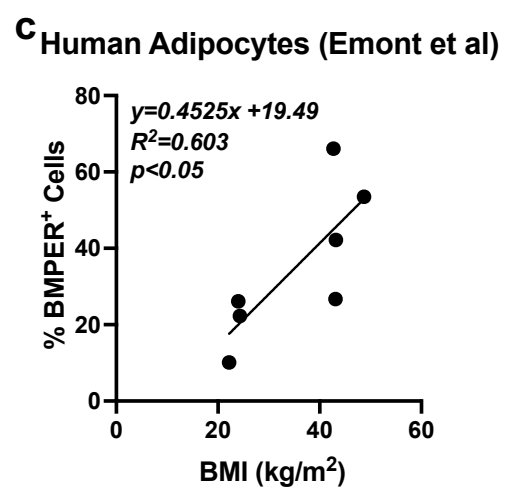

**Supplementary Figure 7: Correlations between BMPER+ cells and body mass index (BMI) in human omental fat.** **A.** Correlation between BMPER+ APCs and BMI in our study. **B** and **C.** Correlations between BMPER+ ASCs and BMPER+ adipocytes and BMI in publicly available (GSE176171) single nuclei RNA sequencing (snRNA-seq). N=7 patients (1 lean male, 2 obese male, 2 lean female and 2 obese female subjects).

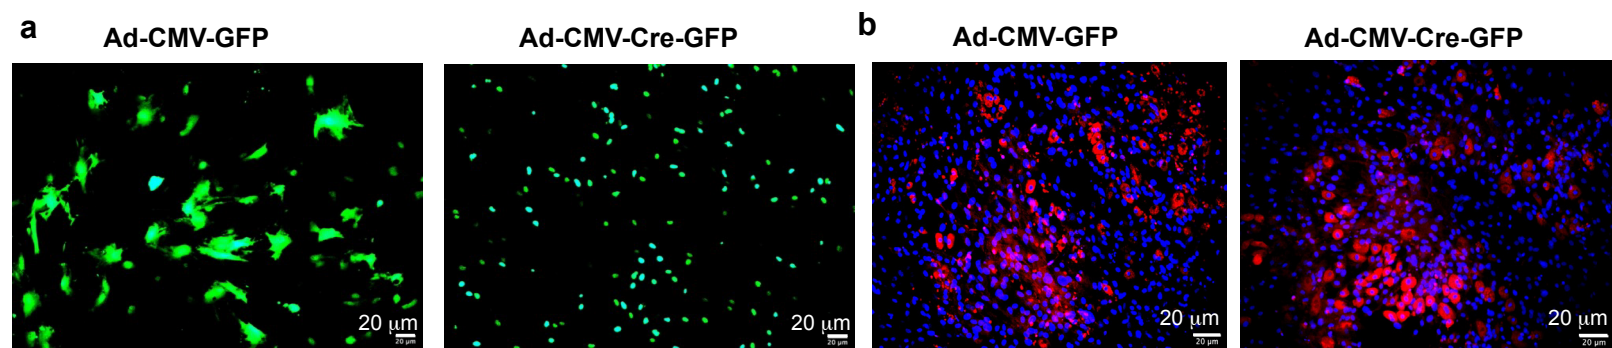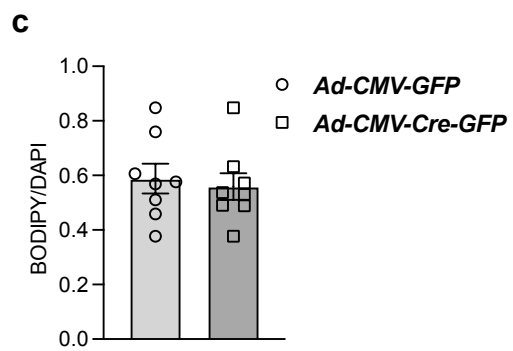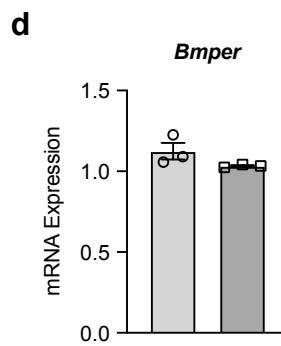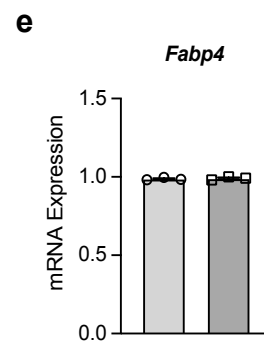

**Supplementary Figure 8: Transfection with Cre in C57BL6/J control mice did not affect adipogenesis of visceral APCs.**

Adipose progenitor cells (APCs) were sorted from epididymal white adipose tissue of male C57BL6/J control mice. **A.** Representative images of green fluorescent protein (GFP) expression in visceral APCs infected with adenovirus expressing GFP control (Ad-CMV-GFP) or adenovirus expressing Cre-GFP (Ad-CMV-Cre-GFP) prior to differentiation. **B.** Representative images showing lipid accumulation in APCs infected with control or Cre-GFP vectors and stained with BODIPY (red) and Dapi (Blue) following differentiation. **C.** Bodipy quantification. **D-E.** Relative mRNA expression of *Bmp4* and *Fabp4* in control GFP or Cre-GFP infected cells following differentiation. Values are mean  $\pm$  SD.

**a**

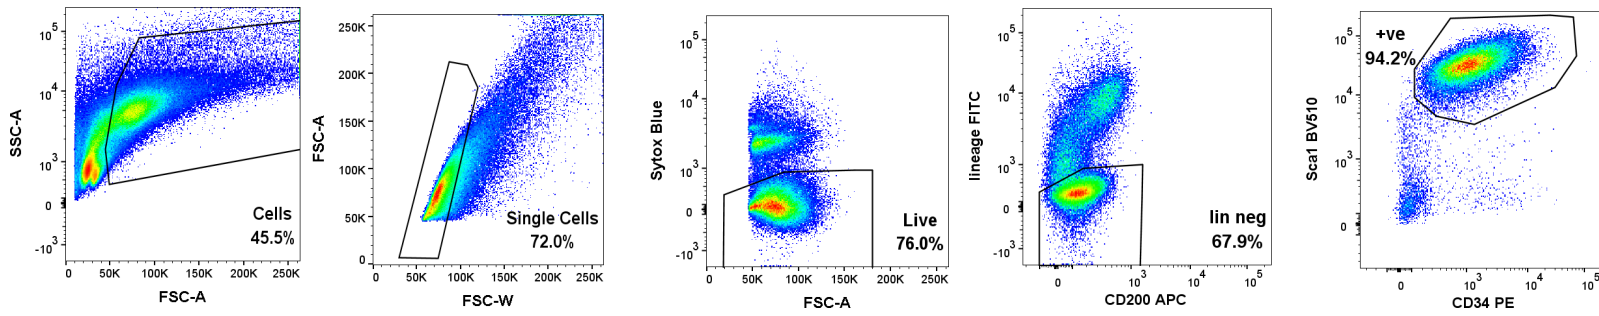

**b**

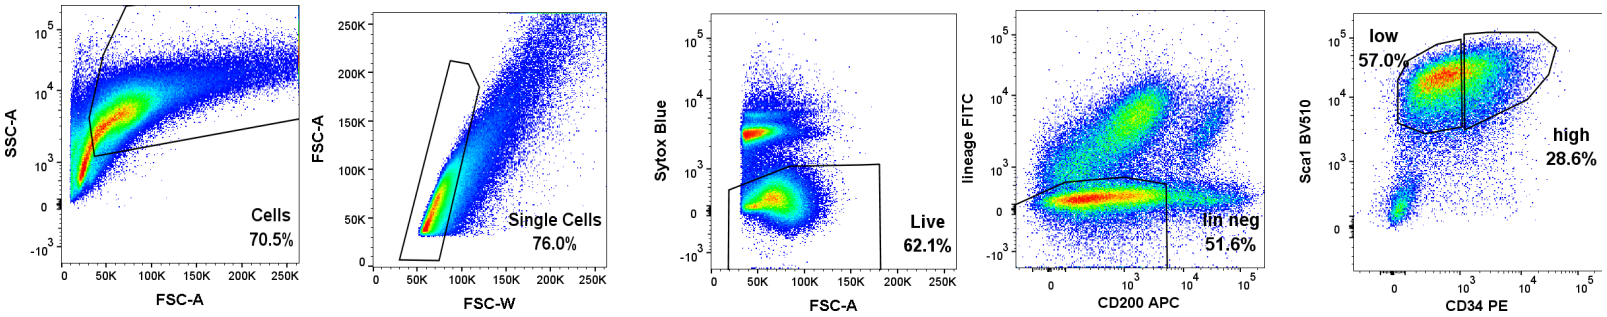

**Supplementary Figure 9: Fluorescence-Activated Cell Sorting (FACS) of adipose progenitor cells.** Representative flow cytometry pseudo-color plots demonstrating FACS sorting strategy for subcutaneous (**A**) and visceral (**B**) adipose progenitor cells (APCs) in mice.

**Supplementary Table 1. Human Subject Characteristics related to the publicly available single nuclei RNA sequencing data set (GSE176171) that we analyzed.**

| <b>Subjects ID</b>       | <b>Age</b> | <b>BMI, kg/m<sup>2</sup></b> |
|--------------------------|------------|------------------------------|
| 1 Hs_OAT_01 obese Female | 29         | 42.7                         |
| 2 Hs_OAT_10 obese Female | 35         | 43.1                         |
| 3 Hs_OAT_12 obese Male   | 36         | 48.7                         |
| 4 Hs_OAT_13 obese Male   | 24         | 43.2                         |
| 5 Hs_OAT_254 lean Female | 41         | 24                           |
| 6 Hs_OAT_255 lean Female | 73         | 24.3                         |
| 7 Hs_OAT_266 lean Male   | 68         | 22.2                         |
