# Supplementary material for: BMPER is a marker of adipose progenitors and adipocytes and a positive modulator of adipogenesis
Source: PubMed Central journal article supplement (PMC10264349; doi:10.1038/s42003-023-05011-w), 2023-06-13
Supplement: 42003_2023_5011_MOESM2_ESM.pdf [file 42003_2023_5011_MOESM2_ESM.pdf]

## Description of Additional Supplementary Files

**File name:** Supplementary Data 1

**Description:** Cell clusters in human stromal vascular cells isolated from omental adipose tissue

**File name:** Supplementary Data 2

**Description:** Cell clusters in mouse stromal vascular cells isolated from perigonadal adipose tissue

**File name:** Supplementary Data 3

**Description:** Cell clusters within the adipo fibro progenitors in human

**File name:** Supplementary Data 4

**Description:** Cell clusters within the adipo fibro progenitors in mouse

**File name:** Supplementary Data 5

**Description:** Pathway analysis of human cell clusters

**File name:** Supplementary Data 6

**Description:** Pathway analysis of mouse cell clusters

**File name:** Supplementary Data 7

**Description:** Source Data behind the graphs in this manuscript
